# Supplementary material for: Altered Ultrasonic Vocalization and Impaired Learning and Memory in Angelman Syndrome Mouse Model with a Large Maternal Deletion from Ube3a to Gabrb3
Source: PubMed Central journal article supplement (PMC2924885; doi:10.1371/journal.pone.0012278), 2010-08-20

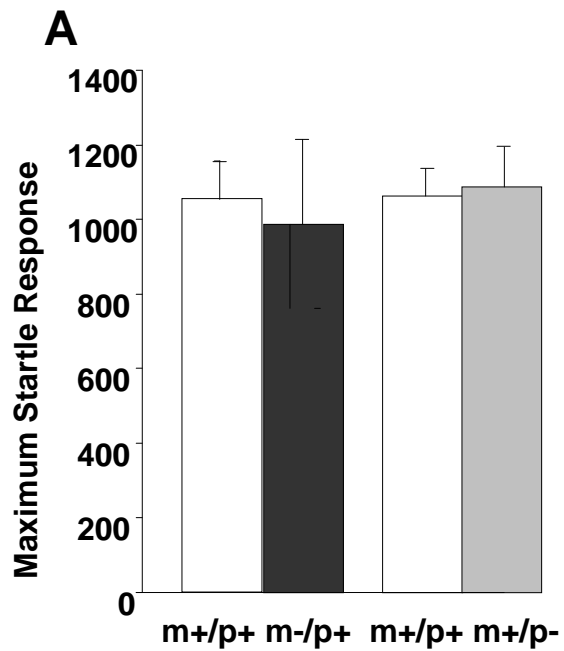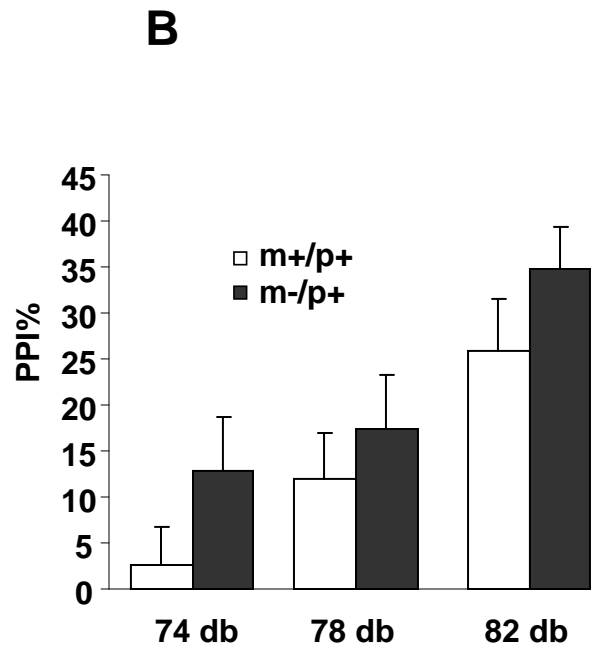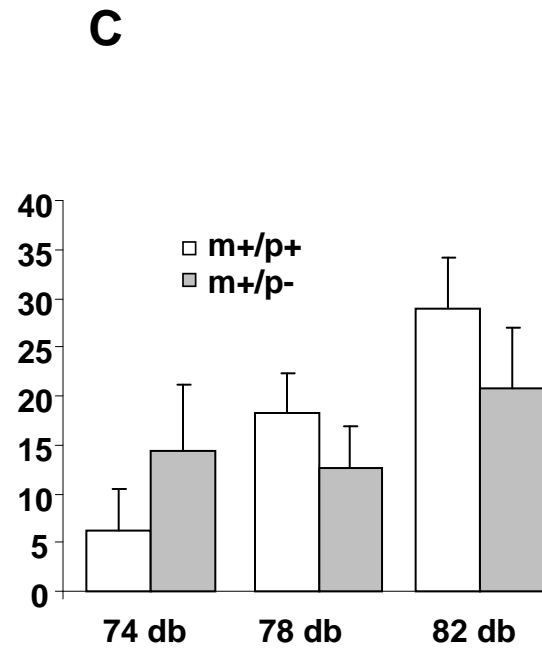

Supplement: pone.0012278.s002.pdf [file pone.0012278.s002.pdf]
